# Is the trocar technique for tube thoracostomy safe in the current era?

Mohan John<sup>a,\*</sup>, Syed Razi<sup>a</sup>, Sandeep Sainathan<sup>b</sup> and Christos Stavropoulos<sup>a</sup>

<sup>a</sup> Department of Surgery, Bronx-Lebanon Hospital Center, Bronx, NY, USA

<sup>b</sup> Department of Cardiothoracic Surgery, Yale-New Haven Hospital, New Haven, CT, USA

\* Corresponding author. Department of Surgery, Bronx-Lebanon Hospital Center, 1650 Selwyn Ave, Apt 4 A, Bronx, NY 10457, USA.  
Tel: +1-9173242267; e-mail: mmjohn@bronxleb.org (M. John).

Received 18 November 2013; received in revised form 20 February 2014; accepted 25 February 2014

## Abstract

A best evidence topic in thoracic surgery was written according to a structured protocol. The question addressed was, 'in adult patients who require a tube thoracostomy, is the trocar technique comparable to blunt dissection in terms of rate of tube malposition or complications?' Altogether more than 258 papers were found using the reported search, of which 7 represented the best evidence to answer the clinical question. The authors, journal, date and country of publication, patient group studied, study type, relevant outcomes and results of these papers were tabulated. The articles included two retrospective reviews, three prospective observational studies and two prospective randomized studies. Of these, four papers concluded that the trocar technique was associated with a significantly higher rate of tube malposition and complications. One retrospective review found that the rate of tube malposition was similar in both groups; however, the trocar technique was abandoned due to the occurrence of severe complications like lung and stomach injury. Another study found that blunt dissection into the pleural space followed by the use of a trocar to direct the chest tube was as safe as and even more effective than blunt dissection alone. A randomized prospective study in cadavers comparing blunt vs sharp tip trocars reported that the use of blunt tip trocars resulted in less complications. We conclude that the trocar technique for chest tube placement should be avoided in adult patients as it is associated with a higher incidence of malposition and complications. The blunt dissection technique with digital exploration of the pleural cavity prior to chest tube placement is the safest technique and should be considered standard practice.

**Keywords:** Chest tubes • Complications • Blunt dissection • Trocar

## INTRODUCTION

A best evidence topic in thoracic surgery was constructed according to a structured protocol. This is fully described in *ICVTS* [1].

## THREE-PART QUESTION

In [adult patients who require a tube thoracostomy] is the [trocar technique] comparable with [blunt dissection] in terms of [rate of tube malposition or complications]?

## CLINICAL SCENARIO

A thoracic surgery consult is requested from the emergency room for a 42-year old gentleman with sudden onset shortness of breath and left-sided chest pain for 4 h. His vital signs and oxygen saturation are normal. Clinical examination reveals absent breath sounds with hyperresonance in the left hemithorax and chest X-ray shows a large left pneumothorax. You decide to place a left intercostal drainage tube and are offered a 24-F trocar thoracostomy kit. You have been taught previously that the trocar

technique is unsafe and should not be used. You decide to re-search the current evidence on this topic.

## SEARCH STRATEGY

A Medline search using the Ovid interface from 1946 to September 2013 with the keywords [exp chest tubes/or exp thoracostomy/or inter-costal drainage tube.mp.] and [techniques or complications].mp. and [trocar or blunt hemostat dissection].mp.

An Embase search from 1947 to September 2013 using the keywords 'chest'/exp OR chest AND ('tube'/exp OR tube) OR thoracostomy OR (inter-costal AND drainage) AND (techniques OR complications) AND ('trocar'/exp OR 'trocar' OR (blunt AND hemostat AND dissection)).

A Medline search using the PubMed interface from 1950 to September 2013 using the keywords (((chest tube) OR thoracostomy) OR intercostal drainage) AND ((techniques) OR complications) AND ((trocar) OR blunt hemostat dissection).

## SEARCH OUTCOME

The OVID search identified 20 papers, the Embase search yielded 90 papers and the PubMed search returned 148 papers. From these,

**Table 1:** Summary of best evidence papers

| Author, date, journal and country<br>Study type<br>(level of evidence) | Patient group                                                                                                                                        | Outcome                              | Key result                                               | Comments                                                                                                                     |
|------------------------------------------------------------------------|------------------------------------------------------------------------------------------------------------------------------------------------------|--------------------------------------|----------------------------------------------------------|------------------------------------------------------------------------------------------------------------------------------|
| Remerand <i>et al.</i> (2007),<br>Anesthesiology,<br>France [2]        | 75 intensive care unit patients requiring thoracostomy for pneumothorax or sterile pleural effusion                                                  | Tube malposition (TM)                | Trocar: 29.6%<br>Blunt dissection: 0%<br>( $P = 0.03$ )  | Use of trocar only factor significantly linked to TM                                                                         |
| Prospective observational<br>(level 2b)                                | 122 chest tubes placed (88.5% trocar)<br><br>106 tubes assessed by CT<br><br>Insertion site: not mentioned                                           |                                      |                                                          |                                                                                                                              |
| Baldt <i>et al.</i> (1995),<br>Radiology,<br>Austria [3]               | 51 patients with blunt chest injury haemothorax or pneumothorax                                                                                      | TM                                   | Trocar: 29%<br>Blunt dissection: 19%                     | No comment made on safety profile of either technique                                                                        |
| 77 chest tubes inserted                                                |                                                                                                                                                      |                                      |                                                          |                                                                                                                              |
| Retrospective review<br>(level 2b)                                     | Trocar ( $n = 48$ )<br><br>Blunt dissection ( $n = 21$ )<br><br>Unknown ( $n = 8$ )<br><br>Insertion site: dorsal/ventral to mid-axillary line (MAL) |                                      |                                                          |                                                                                                                              |
| Millikan <i>et al.</i> (1980),<br>Am J Surg, USA [4]                   | 1249 patients with thoracic trauma requiring thoracostomy for haemothorax, pneumothorax, penetrating injury or major thoracic trauma                 | Empyema                              | Trocar: 2.2%<br>Blunt dissection: 2.7%                   | The trocar technique abandoned due to severe complications-lung/stomach injury                                               |
| Retrospective review<br>(level 2b)                                     | Insertion site: fifth intercostal space (ICS) anterior to MAL                                                                                        | Visceral organ injury                | 1%                                                       |                                                                                                                              |
| Cha <i>et al.</i> (2013),<br>Yonsei Med J,<br>Korea [5]                | 92 patients with spontaneous pneumothorax                                                                                                            | Re-expansion pulmonary oedema (REPO) | Trocar: 86%<br>Blunt dissection: 63%<br>( $P = 0.0009$ ) | The trocar technique only factor associated with the rate of REPO                                                            |
| Prospective observational<br>(level 2b)                                | Trocar ( $n = 44$ )<br><br>Blunt dissection ( $n = 48$ )<br><br>Insertion site: not mentioned                                                        |                                      |                                                          | Ultimate outcomes similar between two groups                                                                                 |
| Al-Tarshihi <i>et al.</i> (2008),<br>Rawal Med J,<br>Jordan [6]        | 224 patients requiring thoracostomy for various aetiologies (including post-thoracic surgery)                                                        | Complications                        | No complications in post-thoracic surgery patients       | Complications only seen in trocar group                                                                                      |
| Prospective observational<br>(level 2b)                                | 339 chest tubes inserted<br><br>Insertion site: not mentioned                                                                                        |                                      | Trocar: $n = 23$<br>Blunt dissection: $n = 0$            | Unclear of how many patients in each group                                                                                   |
| Dural <i>et al.</i> (2010),<br>J Cardiothorac Surg,<br>Turkey [7]      | 180 patients requiring thoracostomy for various aetiologies                                                                                          | TM                                   | Group A: 25.5%<br>Group B: 0%                            | Combined technique of blunt dissection followed by the use of trocar to direct chest tube superior to blunt dissection alone |
| Prospective, randomized<br>(level 1b)                                  | Randomized into 2 groups (90 patients each)                                                                                                          | Ineffective drainage                 | Group A: 4.4%<br>Group B: 0%                             |                                                                                                                              |
|                                                                        | Group A: Surgical technique (blunt dissection)                                                                                                       | Complications                        | Group A: 13.3%<br>Group B: 7.8%<br>( $P < 0.05$ )        |                                                                                                                              |
|                                                                        | Group B: Modified combined technique (blunt dissection + trocar)                                                                                     |                                      |                                                          |                                                                                                                              |
|                                                                        | Insertion site: 5th–7th ICS at anterior axillary line/MAL                                                                                            |                                      |                                                          |                                                                                                                              |

Continued

**Table 1:** (Continued)

| Author, date, journal and country<br>Study type<br>(level of evidence)             | Patient group                                                                  | Outcome                         | Key result                                                              | Comments                                                            |
|------------------------------------------------------------------------------------|--------------------------------------------------------------------------------|---------------------------------|-------------------------------------------------------------------------|---------------------------------------------------------------------|
| Ortner <i>et al.</i> (2012),<br>Scand J Trauma<br>Resusc Emerg Med,<br>Austria [8] | 100 cadavers<br><br>Trocar thoracostomy                                        | TM<br><br>Visceral organ injury | Kit 1: 8%<br>Kit 2: 14%<br><br>Kit 1: 2%<br>Kit 2: 5%<br>( $P < 0.05$ ) | Blunt tip trocar associated with the<br>lower rate of complications |
| Prospective<br>randomized<br>(level 1b)                                            | Kit 1: Blunt tip<br>Kit 2: Sharp tip<br><br>Insertion site: 4th–5th ICS at MAL |                                 |                                                                         |                                                                     |

seven papers were identified that provided the best evidence to answer the question. These are presented in Table 1.

## RESULTS

The trocar technique for tube thoracostomy has the potential advantages of speed of insertion and ability to direct the chest tube. However, it has fallen out of favour largely due to reports of severe organ injury [9–13]. The current British Thoracic Society and Advanced Trauma Life Support guidelines recommend against the use of the trocar for chest tube placement [14, 15].

Papers that included chest catheter placement by the Seldinger technique were not taken into consideration. All chest tubes were inserted without the assistance of radiological marking of the incision site. Chest tubes were inserted for various indications as mentioned in Table 1.

Remerand *et al.* [2] prospectively evaluated 106 chest tubes placed in 75 critically ill patients using computerized tomography. The only factor significantly associated with increased tube malposition (TM) was use of a trocar ( $P = 0.03$ ). However, the duration of thoracic drainage, mechanical ventilation, need for tracheostomy and mortality were not increased by the TM.

Baldt *et al.* [3] reviewed the CT scans of 51 patients who underwent tube thoracostomy following trauma. TM was detected in 26% of chest tubes. Twenty-nine percent of patients who underwent trocar thoracostomy had TM, compared with 19% in the blunt dissection group. Four patients developed intraparenchymal lung haematoma, but no mention was made about the technique of insertion used in these patients. The location of chest tube insertion also had an effect on the rate of TM—33 vs 9% for tubes placed dorsal vs ventral to the mid-axillary line.

Millikan *et al.* [4], in their review of chest tube placement for thoracic trauma, advised against the use of trocar thoracostomy, citing cases of lung and stomach injury. Empyema developed in ~2% of patients, whether the tubes were inserted by the trocar or blunt haemostat technique.

Cha *et al.* [5] prospectively studied the development of re-expansion pulmonary oedema (REPO) following chest tube placement. The use of a trocar was associated with a higher rate of REPO when compared with the haemostat dissection (OR: 5.73, 95% CI: 1.5–21.4;  $P < 0.009$ ). The ultimate outcomes, however, were similar in the trocar and blunt dissection groups.

Al-Tarshihi *et al.* [6] looked at 339 chest tube insertions for varied indications and reported a complication rate of 7.4%. All of

the complications were seen with trocar thoracostomy. The authors did not state how many patients were in the trocar or blunt dissection groups.

Dural *et al.* [7] suggested a modification of the trocar technique for chest tube placement. The pleural cavity is entered by blunt dissection followed by digital exploration and release of adhesions. The thoracostomy tube with trocar is then inserted into the pleural cavity and directed towards the apex. With this technique, the rates of TM (0 vs 25%), ineffective drainage (0 vs 4.4%) and complications (7.8 vs 13.3%) were less than the blunt dissection group ( $P < 0.05$ ).

Ortner *et al.* [8] performed a prospective randomized study on 100 cadavers comparing tube thoracostomy using a blunt tip vs sharp tip trocar. The rates of TM (8 vs 14%) and visceral organ damage (2 vs 5%) were significantly less with the blunt tip ( $P < 0.05$ ).

## Clinical bottom line

The trocar technique for chest tube placement should be avoided in adult patients as it is associated with a higher incidence of TM and severe complications. The blunt dissection technique with digital exploration of the pleural cavity prior to chest tube placement is the safest technique and should be considered standard practice.

**Conflict of interest:** none declared.

## REFERENCES

- [1] Dunning J, Prendergast B, Mackway-Jones K. Towards evidence-based medicine in cardiothoracic surgery: best BETS. *Interact CardioVasc Thorac Surg* 2003;2:405–9.
- [2] Remerand F, Luce V, Badachi Y, Lu Q, Bouhemad B, Rouby JJ. Incidence of chest tube malposition in the critically ill: a prospective computed tomography study. *Anesthesiology* 2007;106:1112–9.
- [3] Baldt MM, Bankier AA, Germann PS, Poschl GP, Skrbensky GT, Herold CJ. Complications after emergency tube thoracostomy: assessment with CT. *Radiology* 1995;195:539–43.
- [4] Millikan JS, Moore EE, Steiner E, Aragon GE, Van Way CW 3rd. Complications of tube thoracostomy for acute trauma. *Am J Surg* 1980; 140:738–41.
- [5] Cha KC, Kim H, Ji HJ, Kwon WC, Shin HJ, Cha YS *et al.* The frequency of reexpansion pulmonary edema after trocar and hemostat assisted

- thoracostomy in patients with spontaneous pneumothorax. *Yonsei Med J* 2013;54:166–71.
- [6] Al-Tarshihi MI, Khamash FA, Ibrahim AEOA. Thoracostomy tube complications and pitfalls: an experience at a tertiary level military hospital. *Rawal Med J* 2008;33:141–44.
- [7] Dural K, Gulbahar G, Kocer B, Sakinci U. A novel and safe technique in closed tube thoracostomy. *J Cardiothorac Surg* 2010;5:21.
- [8] Ortner CM, Ruetzler K, Schaumann N, Lorenz V, Schellongowski P, Schuster E *et al.* Evaluation of performance of two different chest tubes with either a sharp or a blunt tip for thoracostomy in 100 human cadavers. *Scand J Trauma Resusc Emerg Med* 2012;20:10.
- [9] Fraser RS. Lung perforation complicating tube thoracostomy: pathologic description of three cases. *Human Pathol* 1988;19:518–23.
- [10] Meisel S, Ram Z, Priel I, Nass D, Lieberman P. Another complication of thoracostomy—perforation of the right atrium. *Chest* 1990;98:772–3.
- [11] Shapira OM, Aldea GS, Kupferschmid J, Shemin RJ. Delayed perforation of the esophagus by a closed thoracostomy tube. *Chest* 1993;104:1897–8.
- [12] Takanami I. Pulmonary artery perforation by a tube thoracostomy. *Interact CardioVasc Thorac Surg* 2005;4:473–4.
- [13] Zieren J, Enzweiler C, Muller JM. Tube thoracostomy complicates unrecognized diaphragmatic rupture. *Thorac Cardiovasc Surg* 1999;47:199–202.
- [14] Laws D, Neville E, Duffy J. Pleural Diseases Group SoCCBTS. BTS guidelines for the insertion of a chest drain. *Thorax* 2003;58(S2):ii53–9.
- [15] ATLS Course Manual. American College of Surgeons Committee on Trauma. 9th edn. Chicago: ACS, 2012.
